# Supplementary material for: Metagenomic evidence for taxonomic dysbiosis and functional imbalance in the gastrointestinal tracts of children with cystic fibrosis
Source: PubMed Central journal article supplement (PMC4778032; doi:10.1038/srep22493), 2016-03-04
Supplement: srep22493-s1.pdf [file srep22493-s1.pdf]

## Supplementary Information for: Metagenomic evidence for taxonomic dysbiosis and functional imbalance in the gastrointestinal tracts of children with cystic fibrosis

Ohad Manor <sup>1,\*</sup>, Roie Levy <sup>1,\*</sup>, Christopher E. Pope <sup>2</sup>, Hillary S. Hayden <sup>3</sup>, Mitchell J. Brittnacher <sup>3</sup>, Rogan Carr <sup>1</sup>, Matthew C. Radey <sup>3</sup>, Kyle R. Hager <sup>3</sup>, Sonya L. Heltshe <sup>2,6</sup>, Bonnie W. Ramsey <sup>2,6</sup>, Samuel I. Miller <sup>1,3,4</sup>, Lucas R. Hoffman <sup>2,3,6,†</sup>, Elhanan Borenstein <sup>1,5,7,†</sup>

Departments of <sup>1</sup>Genome Sciences, <sup>2</sup>Pediatrics, <sup>3</sup>Microbiology, <sup>4</sup>Medicine, and <sup>5</sup>Computer Science and Engineering, University of Washington, Seattle; <sup>6</sup>Seattle Children's Hospital, Washington; <sup>7</sup>Santa Fe Institute, New Mexico

\* These authors contributed equally to this work

† Co-corresponding authors (LRH: lhoffm@uw.edu, EB: elbo@uw.edu)

| Figure/Table | Description                                                                                                                           |
|--------------|---------------------------------------------------------------------------------------------------------------------------------------|
| Figure S1    | The relative abundance of bacterial phyla among fecal samples separated by subject.                                                   |
| Figure S2    | Principal components analysis (PCA) of the taxonomic profiles after excluding <i>E. coli</i> or samples that had antibiotic exposure. |
| Figure S3    | Principal component analysis (PCA) of the functional profiles using pathway-level abundances.                                         |
| Figure S4    | Temporal patterns in the abundance of the fatty acid degradation and biosynthesis pathways.                                           |
| Figure S5    | A model for how CF GI dysfunction and dysbiosis can lead to inflammation.                                                             |
| Table S1     | Sample information                                                                                                                    |
| Table S2     | Differentially abundant species in CF vs. non-CF samples                                                                              |
| Table S3     | Differentially abundant species when controlling for <i>E. Coli</i>                                                                   |
| Table S4     | Differentially abundant species when controlling for antibiotic exposure                                                              |
| Table S5     | Differentially abundant species when controlling for breastfeeding                                                                    |
| Table S6     | KEGG Pathways found to be enriched in CF samples                                                                                      |
| Table S7     | KEGG Pathways found to be depleted in CF samples                                                                                      |
| Table S8     | KEGG Modules found to be enriched in CF samples                                                                                       |
| Table S9     | KEGG Modules found to be depleted in CF samples                                                                                       |
| Table S10    | Results for subsets of samples excluding antibiotics-treated or breastfed children                                                    |
| Table S11    | List of KOs in the butyrate catabolism module                                                                                         |
| Table S12    | List of KOs in the propionate catabolism module                                                                                       |
| Table S13    | Butyrate and propionate enrichment statistics in CF samples                                                                           |
| Table S14    | Butyrate and propionate correlations with inflammation and fat content                                                                |

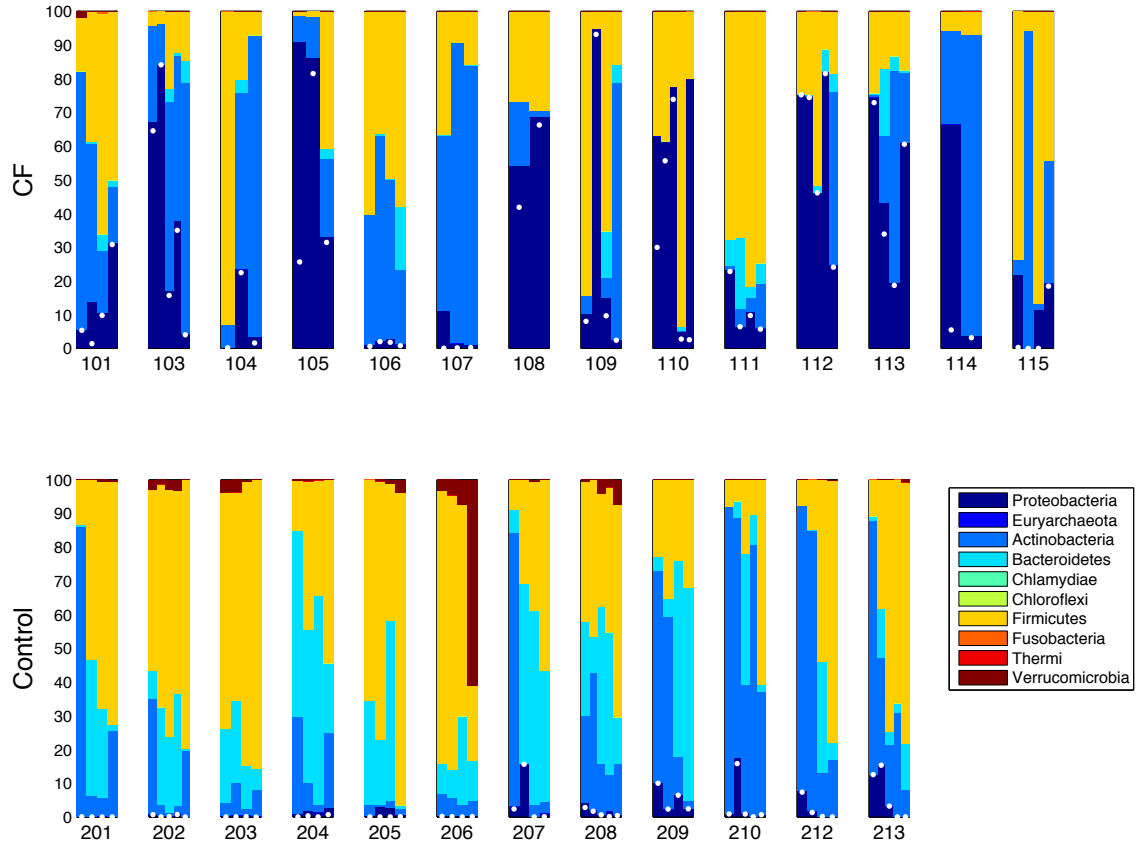

**Figure S1:** The relative abundance of bacterial phyla among fecal samples from children with CF (top) and without CF (bottom), separated by subject. Samples are ordered by age. Relative abundance of *E. coli* is marked in each sample by a white dot.

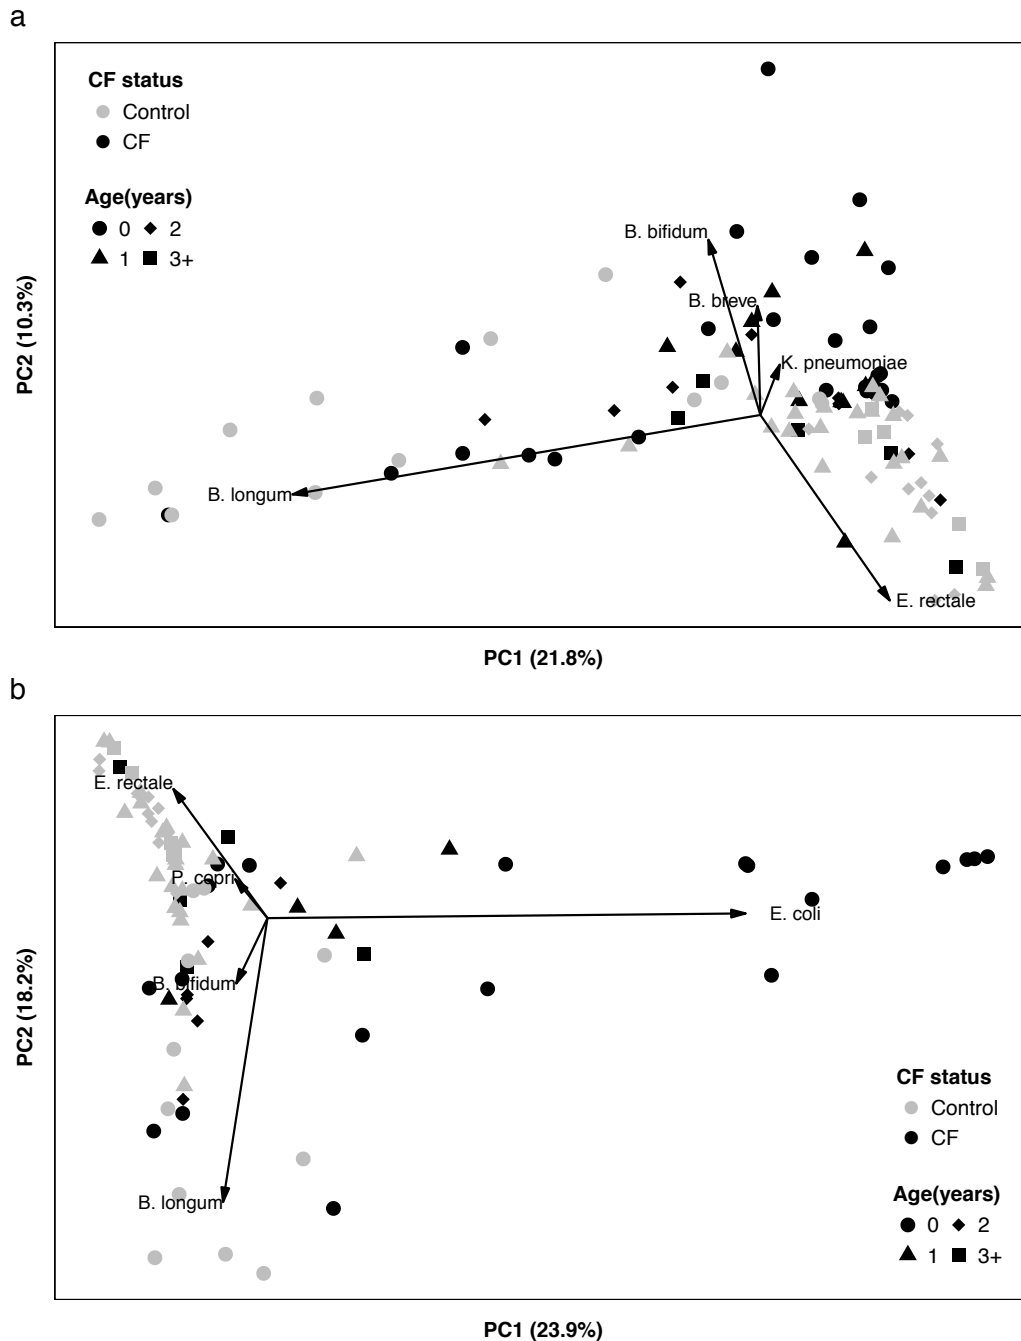

**Figure S2: (a)** Principal components analysis (PCA) of the taxonomic profile of each sample after excluding *E. coli*. The percent of variation explained by each of the first two components is noted on the axes and the top five loadings are illustrated. Evidently, even after excluding *E. coli* (Methods), the microbiota of CF fecal samples differs from non-CF samples, driven largely by the relative abundance of *Bifidobacterium spp* and *E. rectale*. **(b)** Principal components analysis (PCA) of the taxonomic profile of each sample after excluding samples that had antibiotic exposure in the 60 days prior to sampling (and compare to Figure 1b). The percent of variation explained by each of the first two components is noted on the axes and the top five loadings are illustrated.

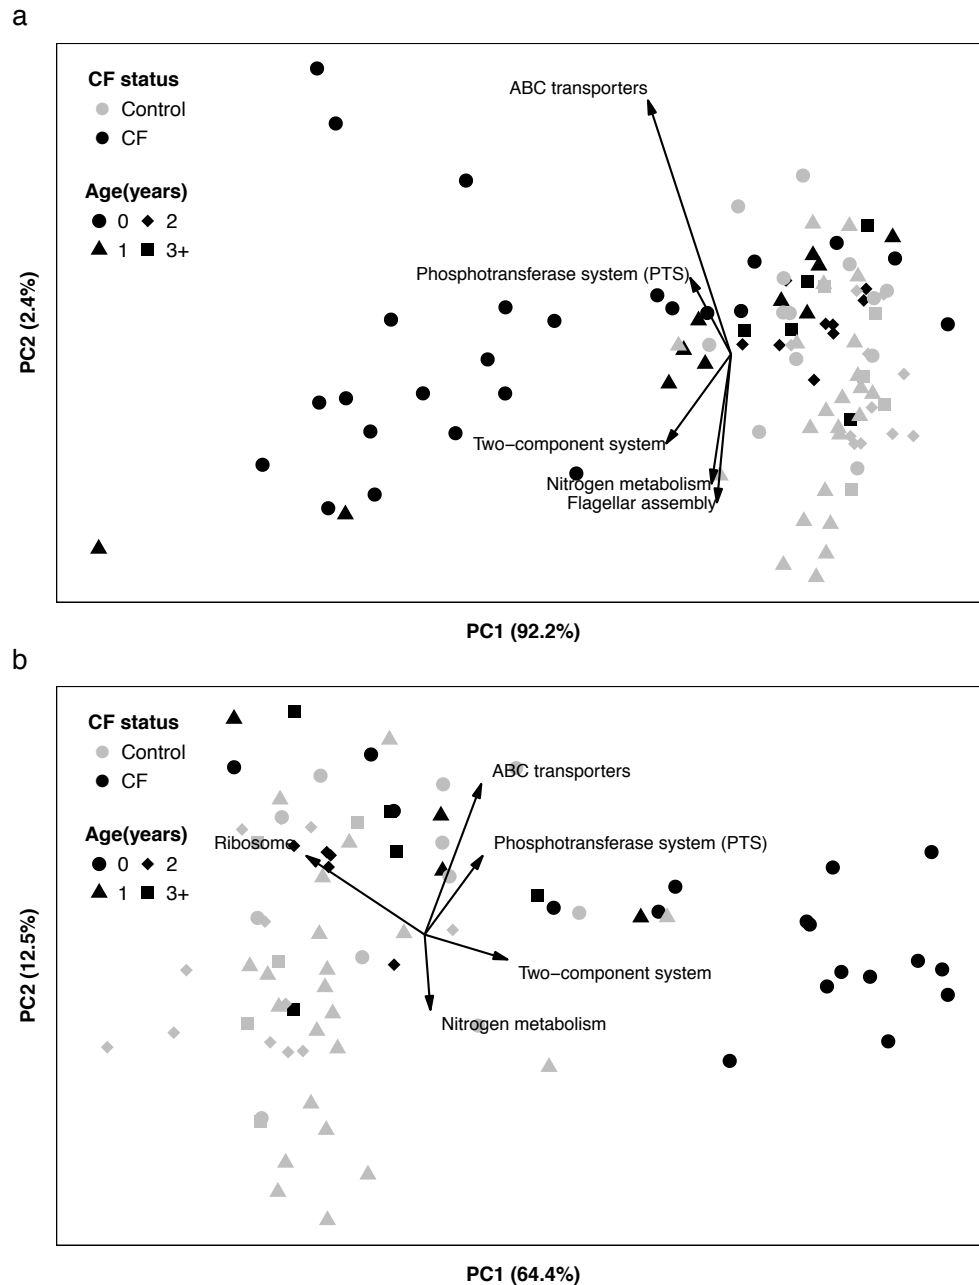

**Figure S3: (a)** Principal component analysis (PCA) using pathway-level abundances corrected by MUSiCC (Methods). Applying MUSiCC to the metagenomic functional profile resulted in better separation between CF (black symbols) and non-CF (gray symbols) samples. The percent of variation explained by each of the first two components is noted on the axes. The top five loadings are also illustrated. **(b)** Principal components analysis (PCA) using pathway-level abundances after excluding samples that had antibiotic exposure in the 60 days prior to sampling (and compare to Figure 2). The percent of variation explained by each of the first two components is noted on the axes and the top five loadings are illustrated.

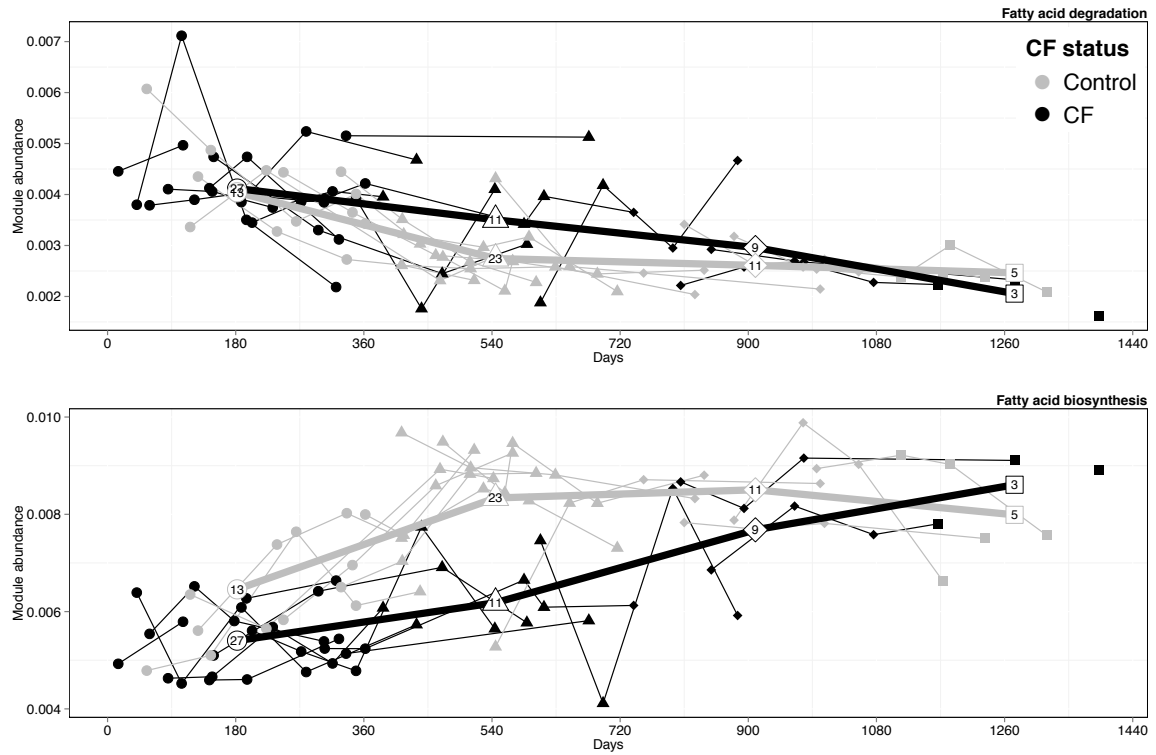

**Figure S4:** Temporal patterns in the abundance of the fatty acid degradation and biosynthesis pathways in fecal samples from children with (black) vs. without (gray) CF. Lines connect samples from the same subject. The bold lines illustrate the average abundance of these pathways for all CF vs. all non-CF samples within a year of age, as in Figure 3. The number of samples available to calculate each average is shown inside the marker.

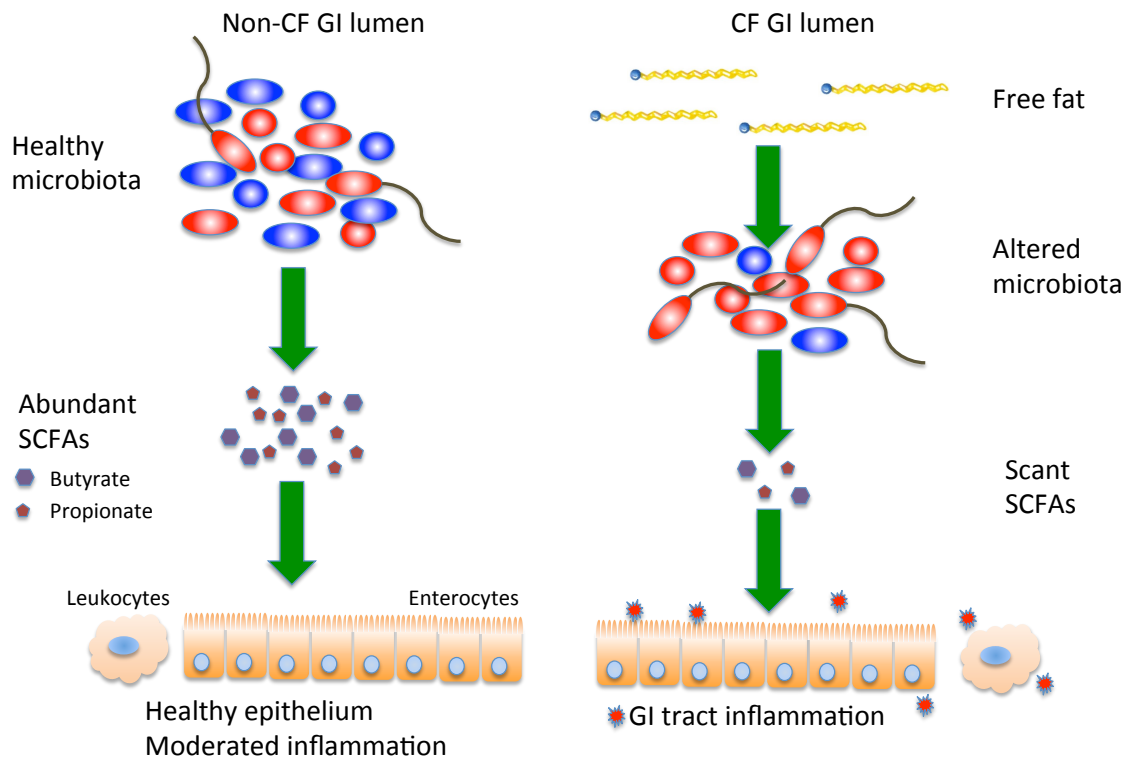

**Figure S5:** A model for how CF GI dysfunction and dysbiosis can lead to inflammation. In the healthy infant GI lumen (left), normal GI microbiota metabolize resistant starches and other polysaccharides to produce short-chain fatty acids (SCFAs), including butyrate and propionate, which in turn regulate GI epithelial health and moderate inflammatory responses through interactions with the GI epithelium and regulatory leukocytes. In the CF GI tract (right), according to the model, unabsorbed luminal fats (free fatty acids and phospholipids) would select for altered GI microbiota that, as a community, produce much lower amounts of the SCFAs butyrate and propionate, resulting in higher levels of GI inflammation.



|     |   |     |            |     |   |       |        |   |   |   |   |   |             |             |
|-----|---|-----|------------|-----|---|-------|--------|---|---|---|---|---|-------------|-------------|
| 208 | 3 | Yes | 9/10/2012  | 528 | 0 | 1.00  | -1.34  | 0 | 0 | 1 | 0 | 0 | 62,416,560  | 62,397,566  |
| 208 | 4 | Yes | 11/13/2012 | 592 | 0 | 0.00  | 35.48  | 0 | 0 | 1 | 0 | 0 | 72,853,264  | 72,840,674  |
| 208 | 5 | No  | 3/17/2013  | 716 | 0 | 0.00  | N/A    | 0 | 0 | 1 | 0 | 0 | 99,237,988  | 99,219,860  |
| 209 | 1 | Yes | 2/23/2012  | 247 | 0 | 0.00  | 22.62  | 1 | 0 | 1 | 0 | 0 | 136,394,272 | 136,370,124 |
| 209 | 2 | Yes | 5/30/2012  | 344 | 0 | 1.00  | 27.58  | 0 | 0 | 1 | 0 | 0 | 48,734,108  | 48,723,324  |
| 209 | 3 | Yes | 9/24/2012  | 461 | 0 | 0.00  | 2.06   | 0 | 0 | 1 | 0 | 0 | 77,317,094  | 77,108,742  |
| 209 | 4 | Yes | 1/10/2013  | 569 | 0 | 0.00  | 12.94  | 0 | 0 | 1 | 0 | 0 | 155,357,400 | 155,118,968 |
| 210 | 1 | Yes | 2/28/2012  | 55  | 0 | 16.67 | 281.97 | 0 | 1 | 0 | 0 | 0 | 139,542,344 | 139,528,886 |
| 210 | 2 | Yes | 5/28/2012  | 145 | 0 | N/A   | N/A    | 0 | 1 | 1 | 0 | 0 | 51,580,806  | 51,572,940  |
| 210 | 3 | Yes | 9/25/2012  | 265 | 0 | 0.00  | 55.05  | 0 | 1 | 1 | 0 | 0 | 63,861,708  | 63,847,612  |
| 210 | 4 | No  | 12/18/2012 | 349 | 0 | 0.00  | N/A    | 0 | 1 | 1 | 1 | 1 | 23,410,466  | 23,408,724  |
| 210 | 5 | No  | 3/18/2013  | 439 | 0 | 1.00  | N/A    | 0 | 0 | 1 | 1 | 1 | 116,894,722 | 116,874,958 |
| 212 | 1 | Yes | 8/14/2012  | 223 | 0 | 0.00  | 5.94   | 1 | 1 | 0 | 0 | 1 | 17,100,150  | 17,089,478  |
| 212 | 2 | Yes | 4/29/2012  | 116 | 0 | 0.00  | 26.65  | 1 | 0 | 0 | 0 | 0 | 61,242,420  | 61,206,736  |
| 212 | 4 | No  | 6/29/2013  | 542 | 0 | N/A   | N/A    | 1 | 0 | 1 | 0 | 0 | 91,382,566  | 91,369,180  |
| 212 | 5 | No  | 4/15/2013  | 467 | 0 | N/A   | N/A    | 1 | 0 | 1 | 0 | 0 | 33,700,722  | 33,692,388  |
| 213 | 1 | Yes | 6/4/2012   | 127 | 0 | 11.11 | 35.43  | 0 | 1 | 0 | 0 | 0 | 74,109,540  | 74,092,616  |
| 213 | 2 | Yes | 9/23/2012  | 238 | 0 | 1.00  | 21.78  | 0 | 1 | 1 | 0 | 0 | 83,985,518  | 83,944,962  |
| 213 | 3 | Yes | 12/30/2012 | 336 | 0 | 0.00  | 67.43  | 0 | 0 | 1 | 0 | 0 | 77,911,810  | 77,890,722  |
| 213 | 4 | No  | 3/17/2013  | 413 | 0 | 0.00  | N/A    | 0 | 0 | 1 | 0 | 0 | 44,597,980  | 44,593,808  |
| 213 | 5 | No  | 6/27/2013  | 515 | 0 | N/A   | N/A    | 0 | 0 | 1 | 0 | 0 | 90,800,782  | 90,787,166  |

\* 0 indicates no such exposure, 1 indicates exposure \*\* Exposure to antibiotics within 30 days and 60 days prior to collection, respectively



Table S2. Species found to be differentially abundant in CF or control samples

| Phylum          | Class               | Order              | Family                | Genus                | Species         | p-value*   | Abundant in** |
|-----------------|---------------------|--------------------|-----------------------|----------------------|-----------------|------------|---------------|
| Actinobacteria  | Actinobacteria      | Actinomycetales    | Actinomycetaceae      | Actinomyces          | odontolyticus   | 0.0072532  | CF            |
| Actinobacteria  | Actinobacteria      | Actinomycetales    | Micrococcaceae        | Rothia               | mucilaginoso    | 0.01450747 | CF            |
| Firmicutes      | Bacilli             | Lactobacillales    | Enterococcaceae       | Enterococcus         | faecalis        | 0.00013375 | CF            |
| Firmicutes      | Bacilli             | Lactobacillales    | Enterococcaceae       | Enterococcus         | faecium         | 0.00182504 | CF            |
| Firmicutes      | Bacilli             | Lactobacillales    | Streptococcaceae      | Streptococcus        | mitis           | 0.01022964 | CF            |
| Firmicutes      | Bacilli             | Lactobacillales    | Streptococcaceae      | Streptococcus        | parasanguinis   | 0.00010819 | CF            |
| Firmicutes      | Clostridia          | Clostridiales      | Clostridiaceae        | Clostridium          | difficile       | 0.01301154 | CF            |
| Firmicutes      | Clostridia          | Clostridiales      | Clostridiaceae        | Clostridium          | perfringens     | 1.7849E-07 | CF            |
| Firmicutes      | Clostridia          | Clostridiales      | ales_Family_XI_Incert | Anaerococcus         | unclassified    | 5.17E-04   | CF            |
| Firmicutes      | Clostridia          | Clostridiales      | ales_Family_XI_Incert | Finexgoldia          | magna           | 1.83E-03   | CF            |
| Firmicutes      | Negativicutes       | Selenomonadales    | Veillonellaceae       | Megasphaera          | micronuciformis | 0.00012521 | CF            |
| Firmicutes      | Negativicutes       | Selenomonadales    | Veillonellaceae       | Veillonella          | atypica         | 5.9523E-06 | CF            |
| Firmicutes      | Negativicutes       | Selenomonadales    | Veillonellaceae       | Veillonella          | dispar          | 6.9323E-09 | CF            |
| Firmicutes      | Negativicutes       | Selenomonadales    | Veillonellaceae       | Veillonella          | parvula         | 0.00015861 | CF            |
| Firmicutes      | Negativicutes       | Selenomonadales    | Veillonellaceae       | Veillonella          | unclassified    | 0.0195996  | CF            |
| Proteobacteria  | Gammaproteobacteria | Enterobacteriales  | Enterobacteriaceae    | Citrobacter          | unclassified    | 0.00205917 | CF            |
| Proteobacteria  | Gammaproteobacteria | Enterobacteriales  | Enterobacteriaceae    | Enterobacter         | cloacae         | 0.00351119 | CF            |
| Proteobacteria  | Gammaproteobacteria | Enterobacteriales  | Enterobacteriaceae    | Enterobacter         | unclassified    | 0.00939806 | CF            |
| Proteobacteria  | Gammaproteobacteria | Enterobacteriales  | Enterobacteriaceae    | Escherichia          | coli            | 6.4355E-10 | CF            |
| Proteobacteria  | Gammaproteobacteria | Enterobacteriales  | Enterobacteriaceae    | Klebsiella           | pneumoniae      | 5.1808E-06 | CF            |
| Proteobacteria  | Gammaproteobacteria | Enterobacteriales  | Enterobacteriaceae    | Klebsiella           | unclassified    | 0.01615305 | CF            |
| Actinobacteria  | Actinobacteria      | Coriobacteriales   | Coriobacteriaceae     | Eggerthella          | lenta           | 0.00016069 | Control       |
| Actinobacteria  | Actinobacteria      | Coriobacteriales   | Coriobacteriaceae     | Gordonibacter        | pamelaeeae      | 1.2765E-06 | Control       |
| Bacteroidetes   | Bacteroidia         | Bacteroidales      | Bacteroidaceae        | Bacteroides          | caccae          | 3.8676E-05 | Control       |
| Bacteroidetes   | Bacteroidia         | Bacteroidales      | Bacteroidaceae        | Bacteroides          | intestinalis    | 0.00194953 | Control       |
| Bacteroidetes   | Bacteroidia         | Bacteroidales      | Bacteroidaceae        | Bacteroides          | ovatus          | 7.4882E-06 | Control       |
| Bacteroidetes   | Bacteroidia         | Bacteroidales      | Bacteroidaceae        | Bacteroides          | unclassified    | 2.1833E-05 | Control       |
| Bacteroidetes   | Bacteroidia         | Bacteroidales      | Bacteroidaceae        | Bacteroides          | vulgatus        | 6.1512E-07 | Control       |
| Bacteroidetes   | Bacteroidia         | Bacteroidales      | Bacteroidaceae        | Bacteroides          | xylanisolvans   | 2.2474E-05 | Control       |
| Bacteroidetes   | Bacteroidia         | Bacteroidales      | Rikenellaceae         | Alistipes            | putredinis      | 0.00021083 | Control       |
| Bacteroidetes   | Bacteroidia         | Bacteroidales      | Rikenellaceae         | Alistipes            | shahii          | 0.00036713 | Control       |
| Firmicutes      | Clostridia          | Clostridiales      | Clostridiaceae        | Clostridium          | asparagiforme   | 8.6113E-05 | Control       |
| Firmicutes      | Clostridia          | Clostridiales      | Clostridiaceae        | Clostridium          | bartlettii      | 4.5371E-07 | Control       |
| Firmicutes      | Clostridia          | Clostridiales      | Clostridiaceae        | Clostridium          | bolteae         | 0.00115164 | Control       |
| Firmicutes      | Clostridia          | Clostridiales      | Clostridiaceae        | Clostridium          | cf              | 0.00034936 | Control       |
| Firmicutes      | Clostridia          | Clostridiales      | Clostridiaceae        | Clostridium          | hathewayi       | 9.6942E-10 | Control       |
| Firmicutes      | Clostridia          | Clostridiales      | Clostridiaceae        | Clostridium          | leptum          | 0.00261205 | Control       |
| Firmicutes      | Clostridia          | Clostridiales      | Clostridiaceae        | Clostridium          | scindens        | 0.0213679  | Control       |
| Firmicutes      | Clostridia          | Clostridiales      | Clostridiaceae        | Clostridium          | symbiosum       | 0.00201465 | Control       |
| Firmicutes      | Clostridia          | Clostridiales      | Clostridiaceae        | Pseudoflavonifractor | capillosus      | 5.16E-11   | Control       |
| Firmicutes      | Clostridia          | Clostridiales      | Clostridiales_uncl    | Blautia              | unclassified    | 1.08E-02   | Control       |
| Firmicutes      | Clostridia          | Clostridiales      | Eubacteriaceae        | Eubacterium          | eligens         | 5.8761E-05 | Control       |
| Firmicutes      | Clostridia          | Clostridiales      | Eubacteriaceae        | Eubacterium          | rectale         | 0.00120544 | Control       |
| Firmicutes      | Clostridia          | Clostridiales      | Eubacteriaceae        | Eubacterium          | siraeum         | 0.00312883 | Control       |
| Firmicutes      | Clostridia          | Clostridiales      | Eubacteriaceae        | Eubacterium          | ventriosum      | 0.00985228 | Control       |
| Firmicutes      | Clostridia          | Clostridiales      | Lachnospiraceae       | Anaerostipes         | caccae          | 0.00030074 | Control       |
| Firmicutes      | Clostridia          | Clostridiales      | Lachnospiraceae       | Butyrivibrio         | unclassified    | 6.5593E-05 | Control       |
| Firmicutes      | Clostridia          | Clostridiales      | Lachnospiraceae       | Roseburia            | intestinalis    | 1.6347E-07 | Control       |
| Firmicutes      | Clostridia          | Clostridiales      | Lachnospiraceae       | Roseburia            | inulinivorans   | 0.00042047 | Control       |
| Firmicutes      | Clostridia          | Clostridiales      | Ruminococcaceae       | Anaerotruncus        | colihominis     | 3.3355E-07 | Control       |
| Firmicutes      | Clostridia          | Clostridiales      | Ruminococcaceae       | Faecalibacterium     | cf              | 0.00067356 | Control       |
| Firmicutes      | Clostridia          | Clostridiales      | Ruminococcaceae       | Faecalibacterium     | prausnitzii     | 4.8396E-05 | Control       |
| Firmicutes      | Clostridia          | Clostridiales      | Ruminococcaceae       | Faecalibacterium     | unclassified    | 0.00029699 | Control       |
| Firmicutes      | Clostridia          | Clostridiales      | Ruminococcaceae       | Ruminococcus         | albus           | 0.01144006 | Control       |
| Firmicutes      | Clostridia          | Clostridiales      | Ruminococcaceae       | Ruminococcus         | bromii          | 7.2634E-06 | Control       |
| Firmicutes      | Clostridia          | Clostridiales      | Ruminococcaceae       | Ruminococcus         | lactaris        | 0.01424808 | Control       |
| Firmicutes      | Clostridia          | Clostridiales      | Ruminococcaceae       | Ruminococcus         | obeum           | 0.01386666 | Control       |
| Firmicutes      | Clostridia          | Clostridiales      | Ruminococcaceae       | Subdoligranulum      | variabile       | 0.00019518 | Control       |
| Firmicutes      | Erysipelotrichi     | Erysipelotrichales | Erysipelotrichaceae   | Coprobacillus        | bacterium       | 0.00027888 | Control       |
| Firmicutes      | Erysipelotrichi     | Erysipelotrichales | Erysipelotrichaceae   | Holdemania           | filiformis      | 0.00234579 | Control       |
| Firmicutes      | Negativicutes       | Selenomonadales    | Veillonellaceae       | Dialister            | invisus         | 0.00064223 | Control       |
| Proteobacteria  | Deltaproteobacteria | Desulfovibrionales | Desulfovibrionaceae   | Bilophila            | wadsworthia     | 0.01876439 | Control       |
| Proteobacteria  | Deltaproteobacteria | Desulfovibrionales | Desulfovibrionaceae   | Desulfovibrio        | desulfuricans   | 6.0021E-08 | Control       |
| Verrucomicrobia | Verrucomicrobiae    | Verrucomicrobiales | Verrucomicrobiaceae   | Akkermansia          | muciniphila     | 1.69E-07   | Control       |

\* Wilcoxon rank-sum test p-value when comparing between CF and control samples; \*\*The sample set in which the species is more abundant.

Table S3. Species found to be differentially abundant in CF or control samples, when controlling for the abundance of E. Coli.

| Phylum          | Class               | Order              | Family                   | Genus                | Species         | p-value*   | Abundant in** |
|-----------------|---------------------|--------------------|--------------------------|----------------------|-----------------|------------|---------------|
| Actinobacteria  | Actinobacteria      | Actinomycetales    | Actinomycetaceae         | Actinomyces          | odontolyticus   | 0.00107511 | CF            |
| Actinobacteria  | Actinobacteria      | Actinomycetales    | Micrococcaceae           | Rothia               | mucilaginoso    | 0.00255669 | CF            |
| Firmicutes      | Bacilli             | Lactobacillales    | Enterococcaceae          | Enterococcus         | faecalis        | 9.9848E-05 | CF            |
| Firmicutes      | Bacilli             | Lactobacillales    | Enterococcaceae          | Enterococcus         | faecium         | 0.00149409 | CF            |
| Firmicutes      | Bacilli             | Lactobacillales    | Streptococcaceae         | Streptococcus        | mitis           | 0.00135023 | CF            |
| Firmicutes      | Bacilli             | Lactobacillales    | Streptococcaceae         | Streptococcus        | parasanguinis   | 3.7353E-06 | CF            |
| Firmicutes      | Bacilli             | Lactobacillales    | Streptococcaceae         | Streptococcus        | salivarius      | 0.0038952  | CF            |
| Firmicutes      | Bacilli             | Lactobacillales    | Streptococcaceae         | Streptococcus        | vestibularis    | 0.01558716 | CF            |
| Firmicutes      | Clostridia          | Clostridiales      | Clostridiaceae           | Clostridium          | difficile       | 0.00948738 | CF            |
| Firmicutes      | Clostridia          | Clostridiales      | Clostridiaceae           | Clostridium          | perfringens     | 1.4968E-07 | CF            |
| Firmicutes      | Clostridia          | Clostridiales      | iales_Family_XI_Incertae | Anaerococcus         | unclassified    | 4.33E-05   | CF            |
| Firmicutes      | Clostridia          | Clostridiales      | iales_Family_XI_Incertae | Finegoldia           | magna           | 0.00121924 | CF            |
| Firmicutes      | Negativicutes       | Selenomonadales    | Veillonellaceae          | Megasphaera          | micronuciformis | 0.00010394 | CF            |
| Firmicutes      | Negativicutes       | Selenomonadales    | Veillonellaceae          | Veillonella          | atypica         | 8.1747E-07 | CF            |
| Firmicutes      | Negativicutes       | Selenomonadales    | Veillonellaceae          | Veillonella          | dispar          | 6.8452E-10 | CF            |
| Firmicutes      | Negativicutes       | Selenomonadales    | Veillonellaceae          | Veillonella          | parvula         | 1.5372E-05 | CF            |
| Firmicutes      | Negativicutes       | Selenomonadales    | Veillonellaceae          | Veillonella          | unclassified    | 0.00584231 | CF            |
| Proteobacteria  | Gammaproteobacteria | Enterobacteriales  | Enterobacteriaceae       | Citrobacter          | unclassified    | 0.00123319 | CF            |
| Proteobacteria  | Gammaproteobacteria | Enterobacteriales  | Enterobacteriaceae       | Enterobacter         | cloacae         | 0.00309602 | CF            |
| Proteobacteria  | Gammaproteobacteria | Enterobacteriales  | Enterobacteriaceae       | Enterobacter         | unclassified    | 0.00806746 | CF            |
| Proteobacteria  | Gammaproteobacteria | Enterobacteriales  | Enterobacteriaceae       | Klebsiella           | pneumoniae      | 2.5971E-06 | CF            |
| Proteobacteria  | Gammaproteobacteria | Enterobacteriales  | Enterobacteriaceae       | Klebsiella           | unclassified    | 0.01615305 | CF            |
| Proteobacteria  | Gammaproteobacteria | Pseudomonadales    | Pseudomonadaceae         | Pseudomonas          | unclassified    | 0.01860113 | CF            |
| Actinobacteria  | Actinobacteria      | Coriobacteriales   | Coriobacteriaceae        | Eggerthella          | lenta           | 0.0076137  | Control       |
| Actinobacteria  | Actinobacteria      | Coriobacteriales   | Coriobacteriaceae        | Gordonibacter        | pamelaeae       | 1.2765E-06 | Control       |
| Bacteroidetes   | Bacteroidia         | Bacteroidales      | Bacteroidaceae           | Bacteroides          | caccae          | 3.8676E-05 | Control       |
| Bacteroidetes   | Bacteroidia         | Bacteroidales      | Bacteroidaceae           | Bacteroides          | intestinalis    | 0.00194953 | Control       |
| Bacteroidetes   | Bacteroidia         | Bacteroidales      | Bacteroidaceae           | Bacteroides          | ovatus          | 1.2127E-05 | Control       |
| Bacteroidetes   | Bacteroidia         | Bacteroidales      | Bacteroidaceae           | Bacteroides          | unclassified    | 4.9762E-05 | Control       |
| Bacteroidetes   | Bacteroidia         | Bacteroidales      | Bacteroidaceae           | Bacteroides          | vulgatus        | 2.9488E-06 | Control       |
| Bacteroidetes   | Bacteroidia         | Bacteroidales      | Bacteroidaceae           | Bacteroides          | xylanisolvans   | 2.5962E-05 | Control       |
| Bacteroidetes   | Bacteroidia         | Bacteroidales      | Rikenellaceae            | Alistipes            | putredinis      | 0.0002163  | Control       |
| Bacteroidetes   | Bacteroidia         | Bacteroidales      | Rikenellaceae            | Alistipes            | shahii          | 0.00039538 | Control       |
| Firmicutes      | Clostridia          | Clostridiales      | Clostridiaceae           | Clostridium          | asparagiforme   | 0.00010964 | Control       |
| Firmicutes      | Clostridia          | Clostridiales      | Clostridiaceae           | Clostridium          | bartlettii      | 1.1194E-06 | Control       |
| Firmicutes      | Clostridia          | Clostridiales      | Clostridiaceae           | Clostridium          | bolteae         | 0.00244916 | Control       |
| Firmicutes      | Clostridia          | Clostridiales      | Clostridiaceae           | Clostridium          | cf              | 0.00036713 | Control       |
| Firmicutes      | Clostridia          | Clostridiales      | Clostridiaceae           | Clostridium          | hathewayi       | 6.5408E-09 | Control       |
| Firmicutes      | Clostridia          | Clostridiales      | Clostridiaceae           | Clostridium          | leptum          | 0.00261205 | Control       |
| Firmicutes      | Clostridia          | Clostridiales      | Clostridiaceae           | Clostridium          | symbiosum       | 0.00309602 | Control       |
| Firmicutes      | Clostridia          | Clostridiales      | Clostridiaceae           | Pseudoflavonifractor | capillosus      | 6.70E-11   | Control       |
| Firmicutes      | Clostridia          | Clostridiales      | Eubacteriaceae           | Eubacterium          | eligens         | 6.5593E-05 | Control       |
| Firmicutes      | Clostridia          | Clostridiales      | Eubacteriaceae           | Eubacterium          | rectale         | 0.00172693 | Control       |
| Firmicutes      | Clostridia          | Clostridiales      | Eubacteriaceae           | Eubacterium          | siraeum         | 0.00312883 | Control       |
| Firmicutes      | Clostridia          | Clostridiales      | Eubacteriaceae           | Eubacterium          | ventriosum      | 0.00985228 | Control       |
| Firmicutes      | Clostridia          | Clostridiales      | Lachnospiraceae          | Anaerostipes         | caccae          | 0.00087281 | Control       |
| Firmicutes      | Clostridia          | Clostridiales      | Lachnospiraceae          | Butyrivibrio         | unclassified    | 9.0887E-05 | Control       |
| Firmicutes      | Clostridia          | Clostridiales      | Lachnospiraceae          | Roseburia            | intestinalis    | 1.7538E-07 | Control       |
| Firmicutes      | Clostridia          | Clostridiales      | Lachnospiraceae          | Roseburia            | inulinivorans   | 0.00047515 | Control       |
| Firmicutes      | Clostridia          | Clostridiales      | Ruminococcaceae          | Anaerotruncus        | colihominis     | 3.3355E-07 | Control       |
| Firmicutes      | Clostridia          | Clostridiales      | Ruminococcaceae          | Faecalibacterium     | cf              | 0.00068975 | Control       |
| Firmicutes      | Clostridia          | Clostridiales      | Ruminococcaceae          | Faecalibacterium     | prausnitzii     | 8.847E-05  | Control       |
| Firmicutes      | Clostridia          | Clostridiales      | Ruminococcaceae          | Faecalibacterium     | unclassified    | 0.00048685 | Control       |
| Firmicutes      | Clostridia          | Clostridiales      | Ruminococcaceae          | Ruminococcus         | albus           | 0.01144006 | Control       |
| Firmicutes      | Clostridia          | Clostridiales      | Ruminococcaceae          | Ruminococcus         | bromii          | 7.4882E-06 | Control       |
| Firmicutes      | Clostridia          | Clostridiales      | Ruminococcaceae          | Ruminococcus         | lactaris        | 0.01531081 | Control       |
| Firmicutes      | Clostridia          | Clostridiales      | Ruminococcaceae          | Subdoligranulum      | variabile       | 0.00019518 | Control       |
| Firmicutes      | Erysipelotrichi     | Erysipelotrichales | Erysipelotrichaceae      | Coprobacillus        | bacterium       | 0.00184527 | Control       |
| Firmicutes      | Erysipelotrichi     | Erysipelotrichales | Erysipelotrichaceae      | Holdemania           | filiformis      | 0.00234579 | Control       |
| Firmicutes      | Negativicutes       | Selenomonadales    | Veillonellaceae          | Dialister            | invisus         | 0.00077629 | Control       |
| Proteobacteria  | Deltaproteobacteria | Desulfovibrionales | Desulfovibrionaceae      | Desulfovibrio        | desulfuricans   | 2.6654E-07 | Control       |
| Verrucomicrobia | Verrucomicrobiae    | Verrucomicrobiales | Verrucomicrobiaceae      | Akkermansia          | muciniphila     | 1.6932E-07 | Control       |

\* Wilcoxon rank-sum test p-value when comparing between CF and control samples; \*\*The sample set in which the species is more abundant.

Table S4. Species found to be differentially abundant in CF or control samples, when excluding samples with antibiotic exposure in the prior 60 days

| Phylum          | Class               | Order              | Family                   | Genus                | Species           | p-value*   | Abundant in** |
|-----------------|---------------------|--------------------|--------------------------|----------------------|-------------------|------------|---------------|
| Actinobacteria  | Actinobacteria      | Actinomycetales    | Actinomycetaceae         | Actinomyces          | odontolyticus     | 0.00147238 | CF            |
| Firmicutes      | Bacilli             | Lactobacillales    | Enterococcaceae          | Enterococcus         | faecalis          | 0.00223126 | CF            |
| Firmicutes      | Bacilli             | Lactobacillales    | Enterococcaceae          | Enterococcus         | faecium           | 0.00108976 | CF            |
| Firmicutes      | Bacilli             | Lactobacillales    | Lactobacillaceae         | Lactobacillus        | gasserii          | 0.017024   | CF            |
| Firmicutes      | Bacilli             | Lactobacillales    | Streptococcaceae         | Streptococcus        | parasanguinis     | 9.7457E-05 | CF            |
| Firmicutes      | Bacilli             | Lactobacillales    | Streptococcaceae         | Streptococcus        | vestibularis      | 0.01243332 | CF            |
| Firmicutes      | Clostridia          | Clostridiales      | Clostridiaceae           | Clostridium          | perfringens       | 1.3561E-06 | CF            |
| Firmicutes      | Clostridia          | Clostridiales      | iales_Family_XI_Incertae | Anaerococcus         | unclassified      | 8.71E-05   | CF            |
| Firmicutes      | Clostridia          | Clostridiales      | iales_Family_XI_Incertae | Clostridium          | magna             | 0.00082763 | CF            |
| Firmicutes      | Negativicutes       | Selenomonadales    | Veillonellaceae          | Megasphaera          | micronuciformis   | 0.00011525 | CF            |
| Firmicutes      | Negativicutes       | Selenomonadales    | Veillonellaceae          | Veillonella          | atypica           | 9.8374E-07 | CF            |
| Firmicutes      | Negativicutes       | Selenomonadales    | Veillonellaceae          | Veillonella          | dispar            | 4.2328E-07 | CF            |
| Firmicutes      | Negativicutes       | Selenomonadales    | Veillonellaceae          | Veillonella          | parvula           | 0.00138279 | CF            |
| Proteobacteria  | Gammaproteobacteria | Enterobacteriales  | Enterobacteriaceae       | Escherichia          | coli              | 8.7636E-07 | CF            |
| Proteobacteria  | Gammaproteobacteria | Enterobacteriales  | Enterobacteriaceae       | Klebsiella           | pneumoniae        | 0.00012184 | CF            |
| Actinobacteria  | Actinobacteria      | Coriobacteriales   | Coriobacteriaceae        | Eggerthella          | lenta             | 0.00300859 | Control       |
| Actinobacteria  | Actinobacteria      | Coriobacteriales   | Coriobacteriaceae        | Gordonibacter        | pamelaeae         | 8.7585E-06 | Control       |
| Bacteroidetes   | Bacteroidia         | Bacteroidales      | Bacteroidaceae           | Bacteroides          | caccae            | 0.00089791 | Control       |
| Bacteroidetes   | Bacteroidia         | Bacteroidales      | Bacteroidaceae           | Bacteroides          | intestinalis      | 0.00676331 | Control       |
| Bacteroidetes   | Bacteroidia         | Bacteroidales      | Bacteroidaceae           | Bacteroides          | ovatus            | 0.00026034 | Control       |
| Bacteroidetes   | Bacteroidia         | Bacteroidales      | Bacteroidaceae           | Bacteroides          | thetaitotaomicron | 0.01723515 | Control       |
| Bacteroidetes   | Bacteroidia         | Bacteroidales      | Bacteroidaceae           | Bacteroides          | unclassified      | 0.00072571 | Control       |
| Bacteroidetes   | Bacteroidia         | Bacteroidales      | Bacteroidaceae           | Bacteroides          | vulgatus          | 4.3181E-06 | Control       |
| Bacteroidetes   | Bacteroidia         | Bacteroidales      | Bacteroidaceae           | Bacteroides          | xylanisolvans     | 0.00042373 | Control       |
| Bacteroidetes   | Bacteroidia         | Bacteroidales      | Rikenellaceae            | Alistipes            | putredinis        | 0.00026034 | Control       |
| Bacteroidetes   | Bacteroidia         | Bacteroidales      | Rikenellaceae            | Alistipes            | shahii            | 0.00147238 | Control       |
| Firmicutes      | Clostridia          | Clostridiales      | Clostridiaceae           | Clostridium          | asparagiforme     | 0.00019225 | Control       |
| Firmicutes      | Clostridia          | Clostridiales      | Clostridiaceae           | Clostridium          | bartlettii        | 6.5053E-06 | Control       |
| Firmicutes      | Clostridia          | Clostridiales      | Clostridiaceae           | Clostridium          | bolteae           | 2.8815E-05 | Control       |
| Firmicutes      | Clostridia          | Clostridiales      | Clostridiaceae           | Clostridium          | cf                | 7.9223E-05 | Control       |
| Firmicutes      | Clostridia          | Clostridiales      | Clostridiaceae           | Clostridium          | hathewayi         | 5.2836E-10 | Control       |
| Firmicutes      | Clostridia          | Clostridiales      | Clostridiaceae           | Clostridium          | leptum            | 0.00774671 | Control       |
| Firmicutes      | Clostridia          | Clostridiales      | Clostridiaceae           | Clostridium          | symbiosum         | 0.00233472 | Control       |
| Firmicutes      | Clostridia          | Clostridiales      | Clostridiaceae           | Pseudoflavonifractor | capillosus        | 7.70E-09   | Control       |
| Firmicutes      | Clostridia          | Clostridiales      | Eubacteriaceae           | Eubacterium          | eligens           | 0.00091261 | Control       |
| Firmicutes      | Clostridia          | Clostridiales      | Eubacteriaceae           | Eubacterium          | rectale           | 0.00658065 | Control       |
| Firmicutes      | Clostridia          | Clostridiales      | Eubacteriaceae           | Eubacterium          | siraenum          | 0.006059   | Control       |
| Firmicutes      | Clostridia          | Clostridiales      | Eubacteriaceae           | Eubacterium          | ventriosum        | 0.01107164 | Control       |
| Firmicutes      | Clostridia          | Clostridiales      | Lachnospiraceae          | Anaerostipes         | caccae            | 0.00063555 | Control       |
| Firmicutes      | Clostridia          | Clostridiales      | Lachnospiraceae          | Butyrivibrio         | unclassified      | 0.00064622 | Control       |
| Firmicutes      | Clostridia          | Clostridiales      | Lachnospiraceae          | Roseburia            | intestinalis      | 1.1962E-07 | Control       |
| Firmicutes      | Clostridia          | Clostridiales      | Lachnospiraceae          | Roseburia            | inulinivorans     | 0.00077511 | Control       |
| Firmicutes      | Clostridia          | Clostridiales      | Ruminococcaceae          | Anaerotruncus        | colihominis       | 1.3561E-06 | Control       |
| Firmicutes      | Clostridia          | Clostridiales      | Ruminococcaceae          | Faecalibacterium     | cf                | 0.00255492 | Control       |
| Firmicutes      | Clostridia          | Clostridiales      | Ruminococcaceae          | Faecalibacterium     | prausnitzii       | 4.5367E-05 | Control       |
| Firmicutes      | Clostridia          | Clostridiales      | Ruminococcaceae          | Faecalibacterium     | unclassified      | 0.00012642 | Control       |
| Firmicutes      | Clostridia          | Clostridiales      | Ruminococcaceae          | Ruminococcus         | albus             | 0.01107164 | Control       |
| Firmicutes      | Clostridia          | Clostridiales      | Ruminococcaceae          | Ruminococcus         | bromii            | 4.0341E-05 | Control       |
| Firmicutes      | Clostridia          | Clostridiales      | Ruminococcaceae          | Ruminococcus         | obeum             | 0.01181081 | Control       |
| Firmicutes      | Clostridia          | Clostridiales      | Ruminococcaceae          | Subdoligranulum      | variabile         | 0.00097369 | Control       |
| Firmicutes      | Erysipelotrichi     | Erysipelotrichales | Erysipelotrichaceae      | Coprobacillus        | bacterium         | 0.01243332 | Control       |
| Firmicutes      | Erysipelotrichi     | Erysipelotrichales | Erysipelotrichaceae      | Holdemania           | filiformis        | 0.00426343 | Control       |
| Firmicutes      | Negativicutes       | Selenomonadales    | Veillonellaceae          | Dialister            | invisus           | 0.00121851 | Control       |
| Proteobacteria  | Deltaproteobacteria | Desulfovibrionales | Desulfovibrionaceae      | Bilophila            | wadsworthia       | 0.01681512 | Control       |
| Proteobacteria  | Deltaproteobacteria | Desulfovibrionales | Desulfovibrionaceae      | Desulfovibrio        | desulfuricans     | 4.4751E-08 | Control       |
| Verrucomicrobia | Verrucomicrobiae    | Verrucomicrobiales | Verrucomicrobiaceae      | Akkermansia          | muciniphila       | 8.5628E-07 | Control       |

\* Wilcoxon rank-sum test p-value when comparing between CF and control samples; \*\*The sample set in which the species is more abundant.

Table S5. Species found to be differentially abundant in CF or control samples, when excluding samples collected from concurrently breastfed subjects

| Phylum          | Class               | Order              | Family                   | Genus                | Species         | p-value*   | Abundant in** |
|-----------------|---------------------|--------------------|--------------------------|----------------------|-----------------|------------|---------------|
| Actinobacteria  | Actinobacteria      | Actinomycetales    | Actinomycetaceae         | Actinomyces          | odontolyticus   | 0.00088566 | CF            |
| Actinobacteria  | Actinobacteria      | Bifidobacteriales  | Bifidobacteriaceae       | Bifidobacterium      | breve           | 0.00950464 | CF            |
| Actinobacteria  | Actinobacteria      | Coriobacteriales   | Coriobacteriaceae        | Collinsella          | aerofaciens     | 0.00965103 | CF            |
| Firmicutes      | Bacilli             | Lactobacillales    | Carnobacteriaceae        | Granulicatella       | adiacens        | 0.01530765 | CF            |
| Firmicutes      | Bacilli             | Lactobacillales    | Streptococcaceae         | Streptococcus        | parasanguinis   | 0.00102908 | CF            |
| Firmicutes      | Clostridia          | Clostridiales      | Clostridiaceae           | Clostridium          | difficile       | 0.00603455 | CF            |
| Firmicutes      | Clostridia          | Clostridiales      | Clostridiaceae           | Clostridium          | perfringens     | 5.1116E-05 | CF            |
| Firmicutes      | Clostridia          | Clostridiales      | iales_Family_XI_Incertae | Finegoldia           | magna           | 0.00814614 | CF            |
| Firmicutes      | Clostridia          | Clostridiales      | Clostridiales_uncl       | Blautia              | hansenii        | 0.00789629 | CF            |
| Firmicutes      | Negativicutes       | Selenomonadales    | Veillonellaceae          | Megasphaera          | micronuciformis | 9.93E-06   | CF            |
| Firmicutes      | Negativicutes       | Selenomonadales    | Veillonellaceae          | Veillonella          | atypica         | 0.00011534 | CF            |
| Firmicutes      | Negativicutes       | Selenomonadales    | Veillonellaceae          | Veillonella          | dispar          | 2.5345E-07 | CF            |
| Firmicutes      | Negativicutes       | Selenomonadales    | Veillonellaceae          | Veillonella          | parvula         | 0.00205228 | CF            |
| Proteobacteria  | Gammaproteobacteria | Enterobacteriales  | Enterobacteriaceae       | Citrobacter          | unclassified    | 0.0032213  | CF            |
| Proteobacteria  | Gammaproteobacteria | Enterobacteriales  | Enterobacteriaceae       | Enterobacter         | cloacae         | 0.01465483 | CF            |
| Proteobacteria  | Gammaproteobacteria | Enterobacteriales  | Enterobacteriaceae       | Escherichia          | coli            | 1.1118E-08 | CF            |
| Proteobacteria  | Gammaproteobacteria | Enterobacteriales  | Enterobacteriaceae       | Klebsiella           | pneumoniae      | 4.2666E-05 | CF            |
| Proteobacteria  | Gammaproteobacteria | Enterobacteriales  | Enterobacteriaceae       | Klebsiella           | unclassified    | 0.00083683 | CF            |
| Proteobacteria  | Gammaproteobacteria | Pseudomonadales    | Pseudomonadaceae         | Pseudomonas          | unclassified    | 0.01265256 | CF            |
| Actinobacteria  | Actinobacteria      | Coriobacteriales   | Coriobacteriaceae        | Gordonibacter        | pamelaeae       | 1.1486E-05 | Control       |
| Bacteroidetes   | Bacteroidia         | Bacteroidales      | Bacteroidaceae           | Bacteroides          | caccae          | 0.00021283 | Control       |
| Bacteroidetes   | Bacteroidia         | Bacteroidales      | Bacteroidaceae           | Bacteroides          | intestinalis    | 0.00707497 | Control       |
| Bacteroidetes   | Bacteroidia         | Bacteroidales      | Bacteroidaceae           | Bacteroides          | ovatus          | 1.607E-05  | Control       |
| Bacteroidetes   | Bacteroidia         | Bacteroidales      | Bacteroidaceae           | Bacteroides          | unclassified    | 0.00021283 | Control       |
| Bacteroidetes   | Bacteroidia         | Bacteroidales      | Bacteroidaceae           | Bacteroides          | vulgatus        | 8.5543E-08 | Control       |
| Bacteroidetes   | Bacteroidia         | Bacteroidales      | Bacteroidaceae           | Bacteroides          | xylanisolvens   | 0.00032058 | Control       |
| Bacteroidetes   | Bacteroidia         | Bacteroidales      | Rikenellaceae            | Alistipes            | putredinis      | 0.00123855 | Control       |
| Bacteroidetes   | Bacteroidia         | Bacteroidales      | Rikenellaceae            | Alistipes            | shahii          | 0.00106815 | Control       |
| Firmicutes      | Clostridia          | Clostridiales      | Clostridiaceae           | Clostridium          | asparagiforme   | 0.00664087 | Control       |
| Firmicutes      | Clostridia          | Clostridiales      | Clostridiaceae           | Clostridium          | bartlettii      | 0.00181231 | Control       |
| Firmicutes      | Clostridia          | Clostridiales      | Clostridiaceae           | Clostridium          | cf              | 0.00480921 | Control       |
| Firmicutes      | Clostridia          | Clostridiales      | Clostridiaceae           | Clostridium          | hathewayi       | 2.5669E-06 | Control       |
| Firmicutes      | Clostridia          | Clostridiales      | Clostridiaceae           | Clostridium          | leptum          | 0.01122919 | Control       |
| Firmicutes      | Clostridia          | Clostridiales      | Clostridiaceae           | Pseudoflavonifractor | capillosus      | 9.07E-08   | Control       |
| Firmicutes      | Clostridia          | Clostridiales      | Eubacteriaceae           | Eubacterium          | eligens         | 0.00091967 | Control       |
| Firmicutes      | Clostridia          | Clostridiales      | Eubacteriaceae           | Eubacterium          | rectale         | 0.01228249 | Control       |
| Firmicutes      | Clostridia          | Clostridiales      | Lachnospiraceae          | Roseburia            | intestinalis    | 5.4676E-05 | Control       |
| Firmicutes      | Clostridia          | Clostridiales      | Ruminococcaceae          | Anaerotruncus        | colihominis     | 7.7749E-06 | Control       |
| Firmicutes      | Clostridia          | Clostridiales      | Ruminococcaceae          | Faecalibacterium     | prausnitzii     | 0.01342241 | Control       |
| Firmicutes      | Clostridia          | Clostridiales      | Ruminococcaceae          | Ruminococcus         | bromii          | 4.1708E-05 | Control       |
| Firmicutes      | Clostridia          | Clostridiales      | Ruminococcaceae          | Subdoligranulum      | variabile       | 0.00205228 | Control       |
| Firmicutes      | Erysipelotrichi     | Erysipelotrichales | Erysipelotrichaceae      | Coprobacillus        | bacterium       | 0.00664087 | Control       |
| Firmicutes      | Erysipelotrichi     | Erysipelotrichales | Erysipelotrichaceae      | Holdemania           | filiformis      | 0.00244589 | Control       |
| Proteobacteria  | Deltaproteobacteria | Desulfovibrionales | Desulfovibrionaceae      | Desulfovibrio        | desulfuricans   | 0.00017273 | Control       |
| Verrucomicrobia | Verrucomicrobiae    | Verrucomicrobiales | Verrucomicrobiaceae      | Akkermansia          | muciniphila     | 1.2344E-06 | Control       |

\* Wilcoxon rank-sum test p-value when comparing between CF and control samples; \*\*The sample set in which the species is more abundant.

**Table S6. KEGG Pathways found to be significantly enriched in abundance in CF samples versus control samples.**

| Pathway                                                      | Median non-zero KOs* | p-value** |
|--------------------------------------------------------------|----------------------|-----------|
| ko02060: Phosphotransferase system (PTS)                     | 73                   | 2.10E-12  |
| ko00480: Glutathione metabolism                              | 21                   | 1.67E-08  |
| ko00130: Ubiquinone and other terpenoid-quinone biosynthesis | 22                   | 4.09E-08  |
| ko00650: Butanoate metabolism                                | 60                   | 3.83E-07  |
| ko00640: Propanoate metabolism                               | 53                   | 1.01E-06  |
| ko00627: Aminobenzoate degradation                           | 27                   | 1.60E-06  |
| ko00410: beta-Alanine metabolism                             | 23                   | 1.83E-06  |
| ko00380: Tryptophan metabolism                               | 25                   | 4.44E-06  |
| ko00362: Benzoate degradation                                | 39                   | 5.02E-06  |
| ko02010: ABC transporters                                    | 325                  | 6.23E-06  |
| ko03070: Bacterial secretion system                          | 58                   | 6.63E-06  |
| ko02020: Two-component system                                | 271                  | 8.46E-06  |
| ko00310: Lysine degradation                                  | 28                   | 2.00E-05  |
| ko00071: Fatty acid degradation                              | 28                   | 5.70E-04  |
| ko00920: Sulfur metabolism                                   | 40                   | 2.50E-03  |
| ko00540: Lipopolysaccharide biosynthesis                     | 30                   | 2.91E-03  |
| ko00790: Folate biosynthesis                                 | 27                   | 5.50E-03  |

\* Median number of KOs from the pathway that have are identified in each sample (see Methods); \*\* Wilcoxon rank-sum test p-value when comparing between CF and control samples.

**Table S7. KEGG Pathways found to be significantly depleted in abundance in CF samples versus control samples.**

| Pathway                                                      | MedianNonZeroKOs* | p-value**  |
|--------------------------------------------------------------|-------------------|------------|
| ko00520: Amino sugar and nucleotide sugar metabolism         | 93                | 1.64E-11   |
| ko00250: Alanine, aspartate and glutamate metabolism         | 46                | 1.79E-11   |
| ko00330: Arginine and proline metabolism                     | 93                | 1.80E-10   |
| ko00670: One carbon pool by folate                           | 24                | 3.71E-09   |
| ko03018: RNA degradation                                     | 31                | 1.38E-08   |
| ko00190: Oxidative phosphorylation                           | 87                | 1.67E-08   |
| ko00061: Fatty acid biosynthesis                             | 22                | 2.43E-08   |
| ko04112: Cell cycle - Caulobacter                            | 21                | 3.80E-08   |
| ko00720: Carbon fixation pathways in prokaryotes             | 71                | 7.87E-08   |
| ko00340: Histidine metabolism                                | 30                | 8.16E-08   |
| ko00730: Thiamine metabolism                                 | 20                | 8.16E-08   |
| ko00710: Carbon fixation in photosynthetic organisms         | 29                | 1.72E-07   |
| ko00500: Starch and sucrose metabolism                       | 71                | 1.98E-07   |
| ko00680: Methane metabolism                                  | 98                | 3.01E-07   |
| ko03060: Protein export                                      | 23                | 4.24E-07   |
| ko00620: Pyruvate metabolism                                 | 68                | 8.31E-07   |
| ko00900: Terpenoid backbone biosynthesis                     | 27                | 1.05E-06   |
| ko03010: Ribosome                                            | 65                | 1.41E-06   |
| ko00010: Glycolysis / Gluconeogenesis                        | 71                | 2.86E-06   |
| ko00550: Peptidoglycan biosynthesis                          | 35                | 7.72E-06   |
| ko00970: Aminoacyl-tRNA biosynthesis                         | 38                | 1.04E-05   |
| ko00240: Pyrimidine metabolism                               | 86                | 1.08E-05   |
| ko00030: Pentose phosphate pathway                           | 44                | 1.11E-05   |
| ko00770: Pantothenate and CoA biosynthesis                   | 25                | 1.41E-05   |
| ko03430: Mismatch repair                                     | 29                | 1.58E-05   |
| ko00260: Glycine, serine and threonine metabolism            | 57                | 2.52E-05   |
| ko03410: Base excision repair                                | 21                | 7.32E-05   |
| ko00300: Lysine biosynthesis                                 | 32                | 1.01E-04   |
| ko03030: DNA replication                                     | 22                | 1.29E-04   |
| ko00760: Nicotinate and nicotinamide metabolism              | 27                | 1.90E-04   |
| ko00040: Pentose and glucuronate interconversions            | 42                | 2.11E-04   |
| ko03440: Homologous recombination                            | 33                | 5.05E-04   |
| ko00400: Phenylalanine, tyrosine and tryptophan biosynthesis | 49                | 1.62E-03   |
| ko00230: Purine metabolism                                   | 125               | 0.00234579 |
| ko00270: Cysteine and methionine metabolism                  | 53                | 0.00234579 |
| ko00020: Citrate cycle (TCA cycle)                           | 47                | 0.00814539 |

\* Median number of KOs from the pathway that have are identified in each sample (see Methods); \*\* Wilcoxon rank-sum test p-value when comparing between CF and control samples.

**Table S8. KEGG Modules found to be significantly enriched in abundance in CF samples versus control samples.**

| Module                                                                                | MedianNonZeroKOs* | p-value** |
|---------------------------------------------------------------------------------------|-------------------|-----------|
| M00550: Ascorbate degradation, ascorbate => D-xylulose-5P                             | 7                 | 1.19E-13  |
| M00117: Ubiquinone biosynthesis, prokaryotes, chorismate => ubiquinone                | 9                 | 3.34E-12  |
| M00529: Denitrification, nitrate => nitrogen                                          | 9                 | 1.79E-11  |
| M00324: Dipeptide transport system                                                    | 5                 | 5.88E-11  |
| M00229: Arginine transport system                                                     | 5                 | 8.32E-11  |
| M00334: Type VI secretion system                                                      | 7                 | 7.43E-10  |
| M00331: Type II general secretion system                                              | 12                | 9.50E-10  |
| M00545: Trans-cinnamate degradation, trans-cinnamate => 2-oxopent-4-enoate + fumarate | 7                 | 1.02E-08  |
| M00530: Dissimilatory nitrate reduction, nitrate => ammonia                           | 10                | 1.38E-08  |
| M00095: C5 isoprenoid biosynthesis, mevalonate pathway                                | 6                 | 7.33E-08  |
| M00546: Purine degradation, xanthine => urea                                          | 12                | 1.21E-07  |
| M00080: Lipopolysaccharide biosynthesis, inner core => outer core => O-antigen        | 10                | 2.13E-07  |
| M00121: Heme biosynthesis, glutamate => protoheme/siroheme                            | 18                | 1.20E-06  |
| M00194: Maltose/maltodextrin transport system                                         | 5                 | 5.02E-06  |
| M00440: Nickel transport system                                                       | 5                 | 5.02E-06  |
| M00133: Polyamine biosynthesis, arginine => agmatine => putrescine => spermidine      | 6                 | 1.36E-04  |
| M00027: GABA (gamma-Aminobutyrate) shunt                                              | 5                 | 1.55E-04  |
| M00374: Dicarboxylate-hydroxybutyrate cycle                                           | 29                | 8.93E-04  |
| M00429: Competence-related DNA transformation transporter                             | 8                 | 8.93E-04  |
| M00307: Pyruvate oxidation, pyruvate => acetyl-CoA                                    | 9                 | 1.38E-03  |
| M00034: Methionine salvage pathway                                                    | 12                | 6.45E-03  |
| M00116: Menaquinone biosynthesis, chorismate => menaquinone                           | 9                 | 7.69E-03  |
| M00239: Peptides/nickel transport system                                              | 5                 | 3.46E-02  |
| M00237: Branched-chain amino acid transport system                                    | 5                 | 3.69E-02  |
| M00176: Assimilatory sulfate reduction, sulfate => H <sub>2</sub> S                   | 9                 | 4.06E-02  |

\* Median number of KOs from the pathway that have are identified in each sample (see Methods); \*\* Wilcoxon rank-sum test p-value when comparing between CF and control samples.

**Table S9. KEGG Modules found to be significantly depleted in abundance in CF samples versus control samples.**

| Module                                                                                    | MedianNonZeroKOs* | p-value**   |
|-------------------------------------------------------------------------------------------|-------------------|-------------|
| M00361: Nucleotide sugar biosynthesis, eukaryotes                                         | 8                 | 3.64E-11    |
| M00083: Fatty acid biosynthesis, elongation                                               | 12                | 5.34E-10    |
| M00001: Glycolysis (Embden-Meyerhof pathway), glucose => pyruvate                         | 22                | 2.60E-09    |
| M00362: Nucleotide sugar biosynthesis, prokaryotes                                        | 11                | 2.81E-09    |
| M00346: Formaldehyde assimilation, serine pathway                                         | 7                 | 1.02E-08    |
| M00051: Uridine monophosphate biosynthesis, glutamine (+ PRPP) => UMP                     | 11                | 2.62E-08    |
| M00359: Aminoacyl-tRNA biosynthesis, eukaryotes                                           | 21                | 3.04E-08    |
| M00119: Pantothenate biosynthesis, valine/L-aspartate => pantothenate                     | 6                 | 5.89E-08    |
| M00432: Leucine biosynthesis, 2-oxoisovalerate => 2-oxoisocaproate                        | 5                 | 9.09E-08    |
| M00096: C5 isoprenoid biosynthesis, non-mevalonate pathway                                | 9                 | 1.01E-07    |
| M00028: Ornithine biosynthesis, glutamate => ornithine                                    | 11                | 1.66E-07    |
| M00002: Glycolysis, core module involving three-carbon compounds                          | 10                | 2.13E-07    |
| M00572: Pimeloyl-ACP biosynthesis, BioC-BioH pathway, malonyl-ACP => pimeloyl-ACP         | 8                 | 3.83E-07    |
| M00360: Aminoacyl-tRNA biosynthesis, prokaryotes                                          | 28                | 4.10E-07    |
| M00049: Adenine ribonucleotide biosynthesis, IMP => ADP,ATP                               | 5                 | 4.54E-07    |
| M00010: Citrate cycle, first carbon oxidation, oxaloacetate => 2-oxoglutarate             | 5                 | 5.20E-07    |
| M00127: Thiamine biosynthesis, AIR => thiamine-P/thiamine-2P                              | 8                 | 6.80E-07    |
| M00173: Reductive citrate cycle (Arnon-Buchanan cycle)                                    | 33                | 7.78E-07    |
| M00115: NAD biosynthesis, aspartate => NAD                                                | 7                 | 8.04E-07    |
| M00179: Ribosome, archaea                                                                 | 34                | 1.01E-06    |
| M00048: Inosine monophosphate biosynthesis, PRPP + glutamine => IMP                       | 16                | 1.12E-06    |
| M00178: Ribosome, bacteria                                                                | 55                | 1.36E-06    |
| M00159: V-type ATPase, prokaryotes                                                        | 8                 | 1.45E-06    |
| M00029: Urea cycle                                                                        | 5                 | 1.71E-06    |
| M00050: Guanine ribonucleotide biosynthesis IMP => GDP,GTP                                | 5                 | 2.14E-06    |
| M00345: Formaldehyde assimilation, ribulose monophosphate pathway                         | 6                 | 2.68E-06    |
| M00120: Coenzyme A biosynthesis, pantothenate => CoA                                      | 9                 | 3.45E-06    |
| M00021: Cysteine biosynthesis, serine => cysteine                                         | 5                 | 3.79E-06    |
| M00026: Histidine biosynthesis, PRPP => histidine                                         | 15                | 4.30E-06    |
| M00125: Riboflavin biosynthesis, GTP => riboflavin/FMN/FAD                                | 9                 | 4.44E-06    |
| M00036: Leucine degradation, leucine => acetoacetate + acetyl-CoA                         | 11                | 6.63E-06    |
| M00003: Gluconeogenesis, oxaloacetate => fructose-6P                                      | 12                | 7.49E-06    |
| M00527: Lysine biosynthesis, DAP aminotransferase pathway, aspartate => lysine            | 9                 | 9.26E-06    |
| M00526: Lysine biosynthesis, DAP dehydrogenase pathway, aspartate => lysine               | 8                 | 1.68E-05    |
| M00023: Tryptophan biosynthesis, chorismate => tryptophan                                 | 13                | 1.73E-05    |
| M00565: Trehalose biosynthesis, D-glucose 1P => trehalose                                 | 9                 | 1.73E-05    |
| M00157: F-type ATPase, prokaryotes and chloroplasts                                       | 8                 | 1.89E-05    |
| M00082: Fatty acid biosynthesis, initiation                                               | 11                | 2.06E-05    |
| M00335: Sec (secretion) system                                                            | 13                | 3.26E-05    |
| M00549: Nucleotide sugar biosynthesis, glucose => UDP-glucose                             | 6                 | 8.16E-05    |
| M00596: Dissimilatory sulfate reduction, sulfate => H2S                                   | 5                 | 8.61E-05    |
| M00019: Valine/isoleucine biosynthesis, pyruvate => valine / 2-oxobutanoate => isoleucine | 6                 | 1.36E-04    |
| M00007: Pentose phosphate pathway, non-oxidative phase, fructose 6P => ribose 5P          | 5                 | 1.95E-04    |
| M00525: Lysine biosynthesis, acetyl-DAP pathway, aspartate => lysine                      | 9                 | 0.000316195 |
| M00061: Uronic acid metabolism                                                            | 7                 | 0.000612258 |
| M00377: Reductive acetyl-CoA pathway (Wood-Ljungdahl pathway)                             | 10                | 0.000627077 |
| M00333: Type IV secretion system                                                          | 10                | 0.000794763 |
| M00373: Ethylmalonyl pathway                                                              | 7                 | 0.001003298 |
| M00570: Isoleucine biosynthesis, threonine => 2-oxobutanoate => isoleucine                | 7                 | 0.001151645 |
| M00165: Reductive pentose phosphate cycle (Calvin cycle)                                  | 14                | 0.001545094 |
| M00439: Oligopeptide transport system                                                     | 5                 | 0.001805017 |
| M00122: Cobalamin biosynthesis, cobinamide => cobalamin                                   | 7                 | 0.001928253 |
| M00183: RNA polymerase, bacteria                                                          | 6                 | 0.001928253 |



|                                                                             |    |             |
|-----------------------------------------------------------------------------|----|-------------|
| M00018: Threonine biosynthesis, aspartate => homoserine => threonine        | 9  | 0.001971019 |
| M00016: Lysine biosynthesis, succinyl-DAP pathway, aspartate => lysine      | 12 | 0.002396963 |
| M00022: Shikimate pathway, phosphoenolpyruvate + erythrose-4P => chorismate | 13 | 0.002668513 |
| M00200: Putative sorbitol/mannitol transport system                         | 5  | 0.003660459 |
| M00260: DNA polymerase III complex, bacteria                                | 10 | 0.004316969 |
| M00004: Pentose phosphate pathway (Pentose phosphate cycle)                 | 12 | 0.006975903 |
| M00532: Photorespiration                                                    | 12 | 0.009668298 |
| M00582: Energy-coupling factor transport system                             | 10 | 0.016442705 |
| M00491: Putative arabinogalactan oligomer transport system                  | 5  | 0.020290967 |
| M00012: Glyoxylate cycle                                                    | 7  | 0.022113209 |
| M00506: CheA-CheYBV (chemotaxis) two-component regulatory system            | 5  | 0.023273549 |
| M00356: Methanogenesis, methanol => methane                                 | 5  | 0.029901227 |

\* Median number of KOs from the pathway that have are identified in each sample (see Methods); \*\* Wilcoxon rank-sum test p-value when comparing between CF and control samples.

**Table S10. Results for subsets of samples excluding those collected after antibiotic exposure or during breastfeeding.**

| Result                                                                                                                                       | All samples                                 | Exclude ABx 30                            | Exclude ABx 60                            | Exclude breastfed                        | Only one sample per individual from age 0-365 days |
|----------------------------------------------------------------------------------------------------------------------------------------------|---------------------------------------------|-------------------------------------------|-------------------------------------------|------------------------------------------|----------------------------------------------------|
| Number of samples                                                                                                                            | 52 CF vs. 52 non-CF                         | 39 CF vs. 50 non-CF                       | 35 CF vs. 49 non-CF                       | 32 CF vs. 44 non-CF                      | 10 CF vs. 6 non-CF                                 |
| Pathways enriched/depleted in CF samples                                                                                                     | 17/36 (5% FDR)                              | 16/32 (5% FDR)                            | 15/30 (5% FDR)                            | 16/29 (5% FDR)                           | 9/26 (10% FDR)                                     |
| Modules enriched/depleted in CF samples                                                                                                      | 25/65 (5% FDR)                              | 21/58 (5% FDR)                            | 20/53 (5% FDR)                            | 20/43 (5% FDR)                           | 8/3 (10% FDR)                                      |
| Fatty acid degradation enriched in CF                                                                                                        | Yes                                         | Yes                                       | Yes                                       | No                                       | No                                                 |
| Fatty acid biosynthesis depleted in CF                                                                                                       | Yes                                         | Yes                                       | Yes                                       | Yes                                      | Yes (10% FDR)                                      |
| Fatty acid biosynthesis modules depleted in CF                                                                                               | M00083, M00082                              | M00083, M00082                            | M00083, M00082                            | M00083, M00082                           | M00083 (10% FDR)                                   |
| Butyrate catabolism module enriched in CF                                                                                                    | P=8.04E-07                                  | P=0.0008                                  | P=0.004                                   | P=0.0019                                 | P=0.05                                             |
| Butyrate non-catabolism module enriched in CF                                                                                                | P=1.32E-04                                  | P=0.0005                                  | P=0.00057                                 | P=0.0068                                 | P=0.51                                             |
| Pronounced increase in the abundance of the butyrate catabolic module in CF compared to the non-catabolic module                             | 1.95-fold vs. 1.07-fold                     | 1.71-fold vs. 1.06-fold                   | 1.66-fold vs. 1.06-fold                   | 1.71-fold vs. 1.05-fold                  | 2.46-fold vs. 1-fold                               |
| Propionate catabolism module enriched in CF                                                                                                  | P=0.00023                                   | P=0.0023                                  | P=0.0093                                  | P=0.042                                  | P=0.039                                            |
| Pronounced increase in the abundance of the propionate catabolic module in CF compared to the non-catabolic module                           | 1.47-fold vs. 1.02-fold                     | 1.42-fold vs. 1.01-fold                   | 1.38-fold vs. 1.01-fold                   | 1.28-fold vs. 1.04-fold                  | 1.69-fold vs. 1-fold                               |
| Significant positive correlation between the abundance of the butyrate and propionate catabolism modules and fecal <b>fat content</b>        | r=0.607 (P<1.0E-04) and r=0.468 (P<1.0E-04) | r=0.67 (P<1.0E-04) and r=0.53 (P<1.0E-04) | r=0.67 (P<1.0E-04) and r=0.51 (P<1.0E-04) | r=0.53 (P<1.0E-04) and r=0.26 (P=0.0294) | r=0.57 (P=0.0207) and r=0.61 (P=0.0134)            |
| Significant positive correlation between the abundance of the butyrate and propionate catabolism modules and fecal <b>inflammation index</b> | r=0.5 (P<1.0E-04) and r=0.445 (P<1.0E-04)   | r=0.58 (P<1.0E-04) and r=0.52 (P<1.0E-04) | r=0.53 (P<1.0E-04) and r=0.49 (P=0.0001)  | r=0.43 (P=0.001) and r=0.38 (P=0.002)    | r=0.538 (P=0.0293) and r=0.527 (P=0.0334)          |

**Table S11. List of KEGG orthology groups (KOs) that have evidence in the literature to be involved in the catabolism of butyrate.**

| Name                       | Enzyme   | KOs                            | Reference                                                                                                                                                         |
|----------------------------|----------|--------------------------------|-------------------------------------------------------------------------------------------------------------------------------------------------------------------|
| bcd                        | 1.3.8.1  | K00248                         | Müller N. <i>et al.</i> , <i>Environ Microbiol Rep</i> . 2(4), 489-99 (2010). And see also: Ikeda Y. <i>et al.</i> , <i>J Biol Chem</i> . 260(2), 1311-25 (1985). |
| atoD, atoA                 | 2.8.3.8  | K01034, K01035                 | Janssen P.H. and Bernhard S., <i>J Bacteriol</i> . 177(13), 3870-2 (1995).                                                                                        |
| ACSM                       | 6.2.1.2  | K01896                         |                                                                                                                                                                   |
| echA, ECHS1, EHHADH, HADHA | 4.2.1.17 | K01692, K07511, K07514, K07515 |                                                                                                                                                                   |
| fadJ, fadB, HADH           | 1.1.1.35 | K01782, K01825, K00022         |                                                                                                                                                                   |
| phbB                       | 1.1.1.36 | K00023                         |                                                                                                                                                                   |
| atoB                       | 2.3.1.9  | K00626                         |                                                                                                                                                                   |
| bdh                        | 1.1.1.30 | K00019                         |                                                                                                                                                                   |

**Table S12. List of KEGG orthology groups (KOs) that have evidence in the literature to be involved in the catabolism of propionate.**

| Name                   | Enzyme   | KOs                            | Reference                                                                  |
|------------------------|----------|--------------------------------|----------------------------------------------------------------------------|
| prpB                   | 4.1.3.30 | K03417                         | Suvorova I.A. <i>et al</i> , <i>J Bacteriol</i> . 194(12), 3234-40 (2012). |
| prpC                   | 2.3.3.5  | K01659                         |                                                                            |
| prpE                   | 6.2.1.17 | K01908                         |                                                                            |
| pccA, pccB             | 6.4.1.3  | K01964, K01965, K01966, K15036 |                                                                            |
| MCEE                   | 5.1.99.1 | K05606                         |                                                                            |
| MUT, mcmA1, mcmA2      | 5.4.99.2 | K01847, K01848, K01849, K11942 |                                                                            |
| acnB                   | 4.2.1.3  | K01682                         |                                                                            |
| prpD                   | 4.2.1.79 | K01720                         |                                                                            |
| mmcD                   | 4.1.1.41 | K11264                         |                                                                            |
| LSC1, LSC2, sucD, sucC | 6.2.1.5  | K01899, K01900, K01902, K01903 | Kosaka T. <i>et al</i> ., <i>J Bacteriol</i> . 188(1), 202-10 (2006).      |

**Table S13. Comparison of KEGG pathways with manual separation to catabolism and non-catabolism modules.**

| Pathway / module                  | # KOs* | Mean relative abundance in CF | Mean relative abundance in control | p-value** | fold-ratio CF/control |
|-----------------------------------|--------|-------------------------------|------------------------------------|-----------|-----------------------|
| Butyrate metabolism               | 70     | 0.0097                        | 0.0084                             | 3.83E-07  | 1.14                  |
| Butyrate catabolism enzymes       | 14     | 0.0010715                     | 0.00055017                         | 8.04E-07  | 1.95                  |
| Butyrate non-catabolism enzymes   | 50     | 0.007785                      | 0.0072958                          | 1.32E-04  | 1.07                  |
| propionate metabolism             | 66     | 0.0089                        | 0.0081                             | 1.01E-06  | 1.10                  |
| propionate catabolism enzymes     | 19     | 0.0018663                     | 0.0012687                          | 2.34E-04  | 1.47                  |
| propionate non-catabolism enzymes | 43     | 0.0067485                     | 0.006593                           | 5.67E-01  | 1.02                  |

\* The number of KOs that are included in the pathway/module (see Methods); \*\* Wilcoxon rank-sum test p-value when comparing between CF and control samples.

**Table S14. Comparison of KEGG pathways with manual separation to catabolism and non-catabolism modules.**

| Pathway / module                  | # KOs* | Inflammation index (calprotein) |            |                   | Fat content   |            |                   |
|-----------------------------------|--------|---------------------------------|------------|-------------------|---------------|------------|-------------------|
|                                   |        | Correlation**                   | p-value*** | Passes Bonferonni | Correlation** | p-value*** | Passes Bonferonni |
| Butyrate metabolism               | 70     | 0.292                           | 0.0015     | yes               | 0.418         | < 1.0E-04  | yes               |
| Butyrate catabolism enzymes       | 14     | 0.501                           | < 1.0E-04  | yes               | 0.607         | < 1.0E-04  | yes               |
| Butyrate non-catabolism enzymes   | 50     | 0.246                           | 0.0201     | no                | 0.407         | 0.0005     | yes               |
| propionate metabolism             | 66     | 0.31                            | 0.0009     | yes               | 0.419         | < 1.0E-04  | yes               |
| propionate catabolism enzymes     | 19     | 0.445                           | < 1.0E-04  | yes               | 0.468         | < 1.0E-04  | yes               |
| propionate non-catabolism enzymes | 43     | -0.0163                         | 0.536      | no                | 0.0695        | 0.263      | no                |

\* The number of KOs that are included in the pathway/module; \*\* Pearson's correlation of abundance profile with inflammation or fat content; \*\*\* Pearson's correlation significance test p-value using 10,000 permutations
